# Supplementary material for: Isolation, identification and molecular docking of anti-inflammatory peptides from walnut (Juglans regia L.) meal hydrolysates
Source: Royal Society of Chemistry journal article supplement (doi:10.1039/d3fo00768e), 2023-01-01
Supplement: d3fo00768e1.pdf [file d3fo00768e1.pdf]

## Supplementary data 2: Cell viability data

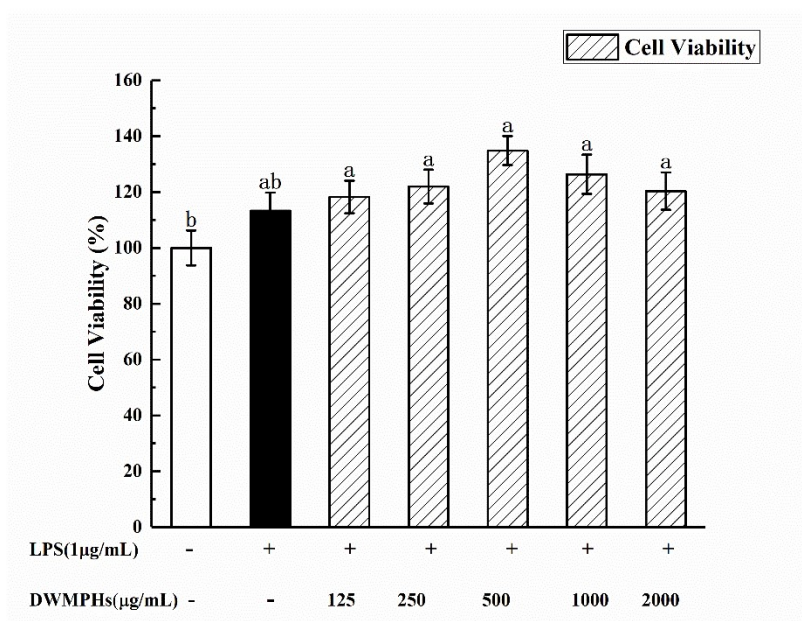

**Fig. S10.** Effects of different concentrations of DWMPHs on the activity of RAW264.7 cells. Values are means  $\pm$  SD of three determinations. Different letters (a-b) are means that are significantly different ( $P < 0.05$ ).

The effects of different concentrations of complex protease defatted walnut meal protein hydrolysates (DWMPHs) on RAW264.7 cell viability are as shown in Fig. S10. The cell viability did not decrease but slightly increased under the stimulation of LPS, indicating that the presence of LPS didn't affect the cell viability. The cell viability was higher than the blank group when the hydrolysate concentrations were 0~2000  $\mu\text{g/mL}$ , and with the increase of the concentration, the cell viability showed a trend of increasing first and then decreasing. The maximum activity was observed at concentration of 500  $\mu\text{g/mL}$ , indicating no toxicity to RAW264.7 cells when the concentration of enzymatic hydrolysate was lower than 2000  $\mu\text{g/mL}$ . Therefore, no inhibition on cell viability was observed at hydrolysate concentrations up to 2000  $\mu\text{g/mL}$  in LPS-induced RAW264.7 cells.

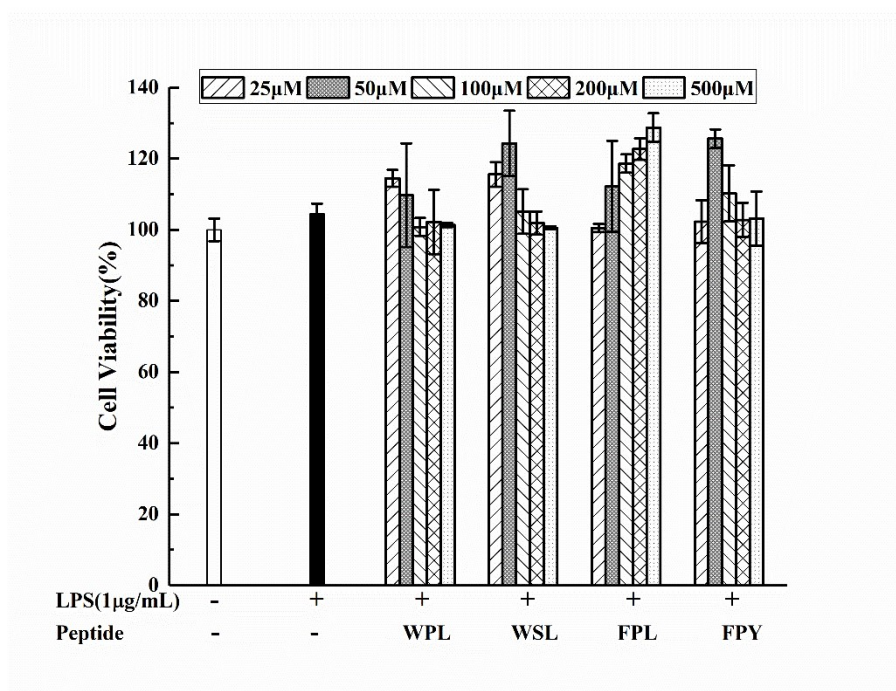

**Fig. S11.** Effects of four synthetic peptides on the activity of RAW264.7 cells. WPL, (Trp-Pro-Leu), WSL, (Trp-Ser-Leu), FPL, (Phe-Pro-Leu) and FPY, (Phe-Pro-Tyr).

The safety of four synthetic peptides WPL, WSL, FPL and FPY was explored, as shown in Fig. S11. Four synthetic tripeptides can promote cell proliferation in different degree at the tested concentrations (0~500 µM), thus, the peptides did not exhibit any cytotoxic effect on RAW264.7 macrophages.

The effects of WSL and FPY on cell viability was inverted U-shaped with the increase of concentration, and the cell viability was the highest at the concentration of 50 µM, reaching  $124.34 \pm 9.18\%$  and  $125.62 \pm 2.63\%$ , respectively. The cell viability decreased gradually with the increase of WPL concentration, but it was still higher than that of blank group. The cell viability was the lowest at the concentration of WPL was 500 µM, which was  $101.34 \pm 0.58\%$ . On the contrary, the cell viability increased gradually with the increase of the concentration of FPL, and reached the maximum value of  $128.77 \pm 3.99\%$  at the concentration of 500 µM.

Therefore, none of the four tripeptides was toxic at concentrations ranging from 0~500  $\mu\text{M}$  and could be used for further determination of anti-inflammatory activity.
